# Supplementary material for: Oxidative muscles have better mitochondrial homeostasis than glycolytic muscles throughout life and maintain mitochondrial function during aging
Source: PubMed Central journal article supplement (PMC6286850; doi:10.18632/aging.101643), 2018-11-18
Supplement: aging-10-101643-s001.pdf [file aging-10-101643-s001.pdf]

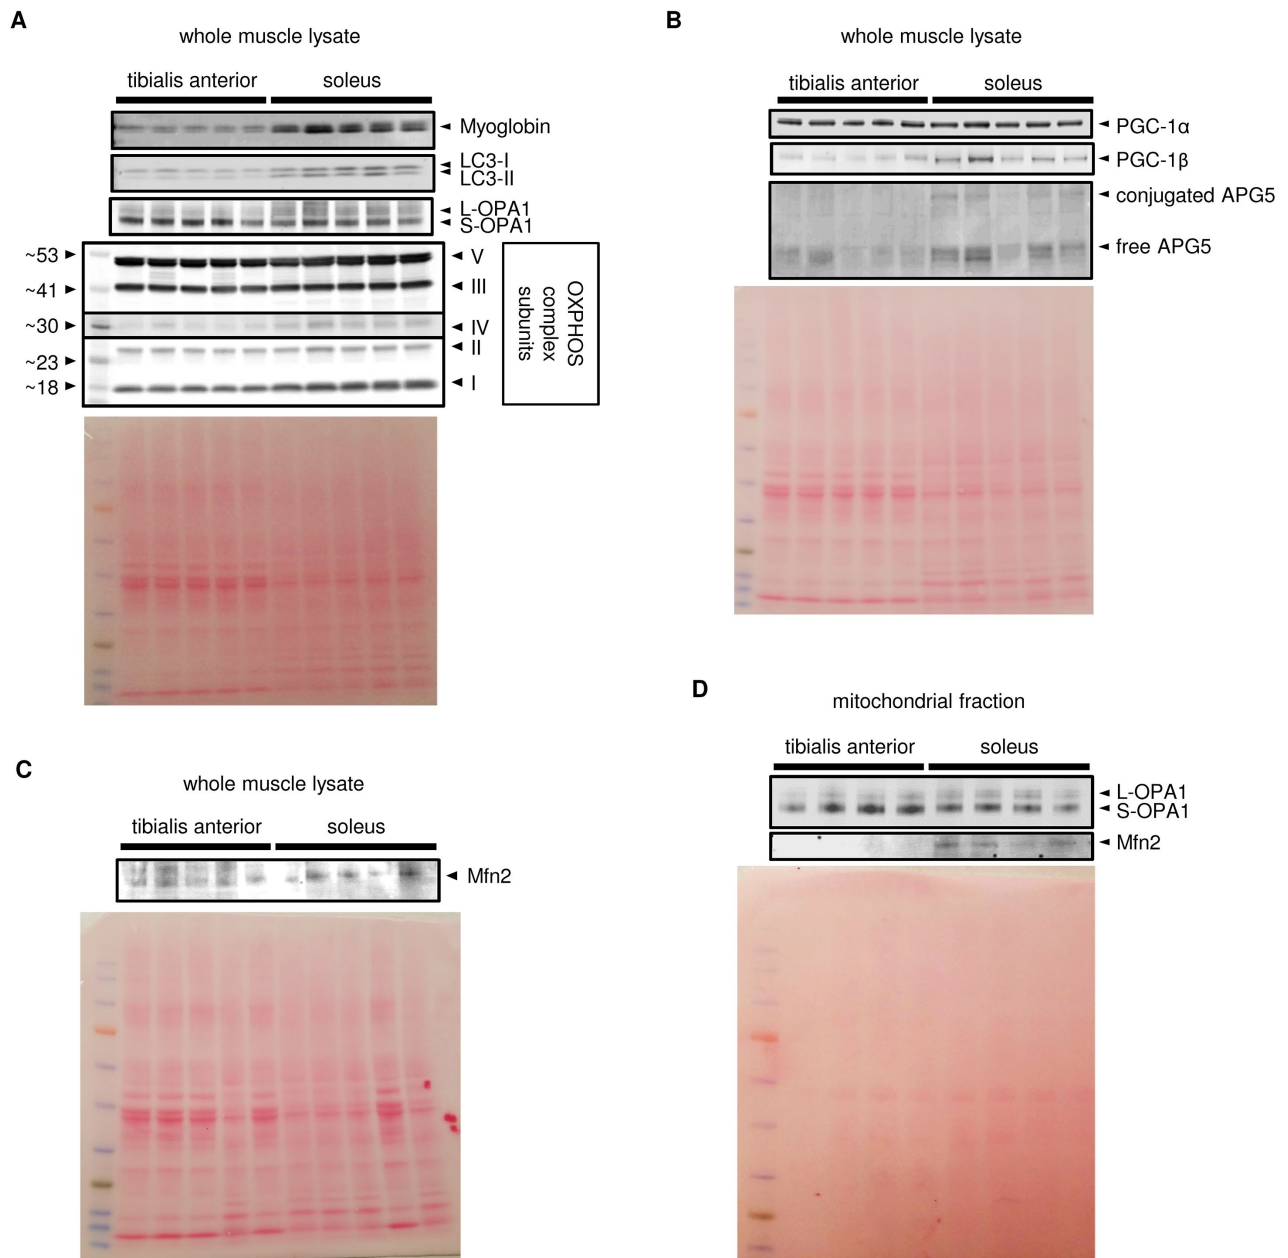

**Figure S1. In young mice, the soleus is more oxidative than the tibialis anterior, and expresses higher levels of mitochondrial biogenesis, fission/fusion and autophagy markers.** Markers of oxidative metabolism (myoglobin and representative OXPHOS complex subunits), mitochondrial biogenesis (PGC-1 $\alpha$ , PGC-1 $\beta$ ), fusion/fission (Mfn2, short (S) and long (L)-OPA1), and autophagy (LC3-II/I and APG5) were assessed in whole muscle lysates (A-C) and mitochondrial fractions (D) of tibialis anterior and soleus muscles from young (3 mo) mice. Ponceau-stained blots were used for normalization; the entire Ponceau lane was quantified for each sample. Representative blots are shown (A-C, 3 independent technical replicates of 5 mice/group; D, 4 mice/group).
