# Supplementary material for: Oxidative muscles have better mitochondrial homeostasis than glycolytic muscles throughout life and maintain mitochondrial function during aging
Source: PubMed Central journal article supplement (PMC6286850; doi:10.18632/aging.101643), 2018-11-18
Supplement: aging-10-101643-s002.pdf [file aging-10-101643-s002.pdf]

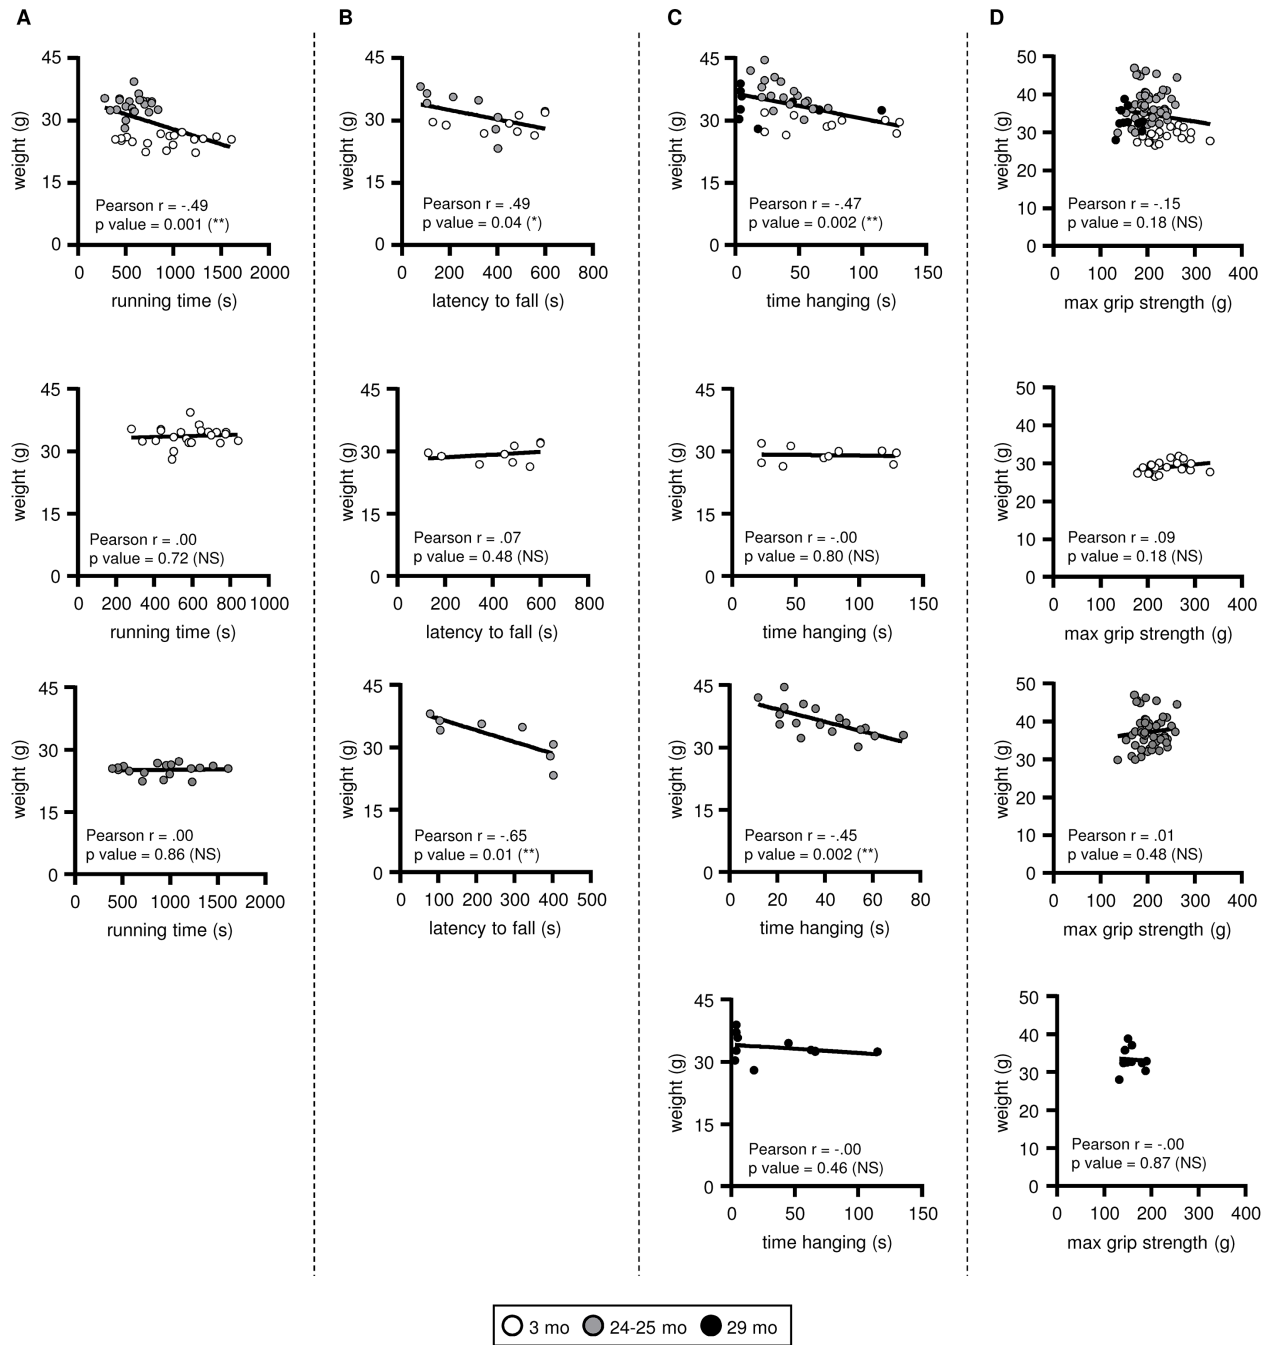

**Figure S2. Correlation between body weight and treadmill, rotarod, hang-wire and grip strength test performance.**

Exercise performance and muscle strength were evaluated in young (3 mo) and old (24-25 and 29 mo) mice and correlated with body weight. (A) Time to exhaustion on the treadmill; 3 mo (n=20), 24 mo (n=24). (B) Latency to fall from the rotarod; 3 mo (n=9), 24 mo (n=24). (C) Time spent hanging in the hang-wire test; 3 mo (n=11), 24 mo (n=18), 29 mo (n=11). (D) Four-limb grip strength test; 3 mo (n=20), 24 mo (n=26), 24 mo (n=24), 29 mo (n=11).
