# Supplementary material for: Oxidative muscles have better mitochondrial homeostasis than glycolytic muscles throughout life and maintain mitochondrial function during aging
Source: PubMed Central journal article supplement (PMC6286850; doi:10.18632/aging.101643), 2018-11-18
Supplement: aging-10-101643-s004.pdf [file aging-10-101643-s004.pdf]

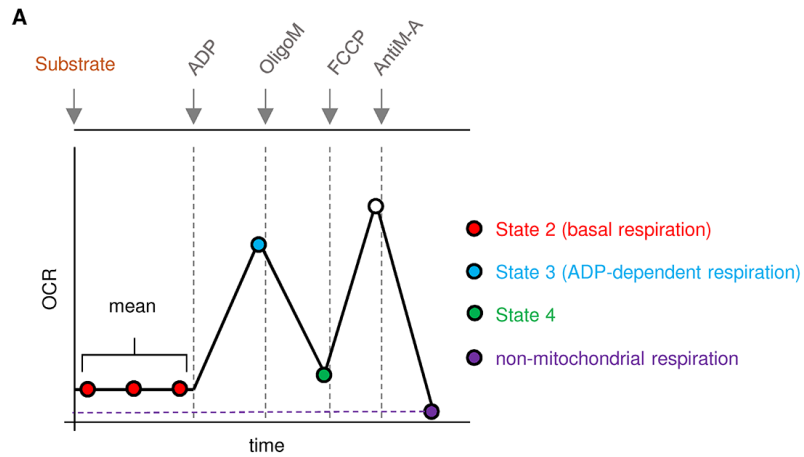

| METHOD                                                                  |
|-------------------------------------------------------------------------|
| State 2 (basal respiration) = mean of 3 basal state OCR measurements    |
| State 3 (ADP-dependent respiration) = OCR after ADP injection           |
| State 4 = OCR after Oligomycin M injection (inhibition of ATP synthase) |
| Respiratory Control Index (RCI) = State 3/State 4                       |

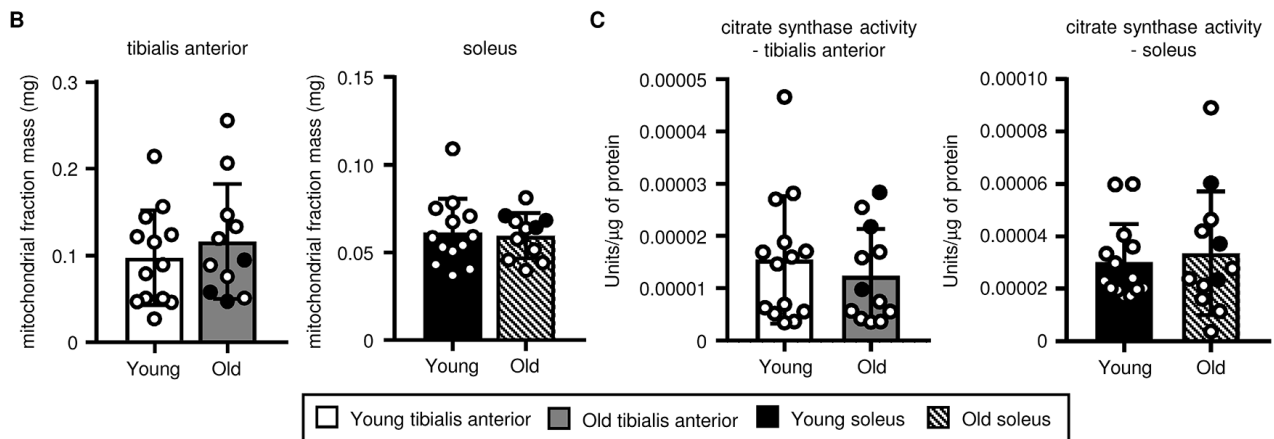

**Figure S4. Respirometry analysis and assessment of mitochondrial aging.** Seahorse assays were performed to assess mitochondrial function. (A) Experimental set up for respirometry assessment using pyruvate, succinate or palmitoylcarnitine as substrates. OCR: oxygen consumption rate; OligoM: oligomycin; AntiM-A: antimycinA. State 2 (basal), State 3 (ADP-dependent), and State 4 (oligomycin-insensitive) respiration, and the Respiratory Control Index (RCI) were calculated as indicated. (B) The mass of the mitochondrial fractions isolated from the whole tibialis anterior and soleus muscles of young (3 mo, n=13) and old (28-29 mo, n=11) mice was calculated using a DC assay. (C) The citrate synthase activity per microgram of the mitochondrial fraction from the tibialis anterior and soleus muscles of young (3 mo, n=13) and old (28-29 mo, n=12) mice was evaluated using an assay kit. Congenic CD45.2 and CD45.1 old mice were used (b-c; young mice were all CD45.2): white dots = CD45.2, black dots = CD45.1.
