# Supplementary material for: Oxidative muscles have better mitochondrial homeostasis than glycolytic muscles throughout life and maintain mitochondrial function during aging
Source: PubMed Central journal article supplement (PMC6286850; doi:10.18632/aging.101643), 2018-11-18
Supplement: aging-10-101643-s008.pdf [file aging-10-101643-s008.pdf]

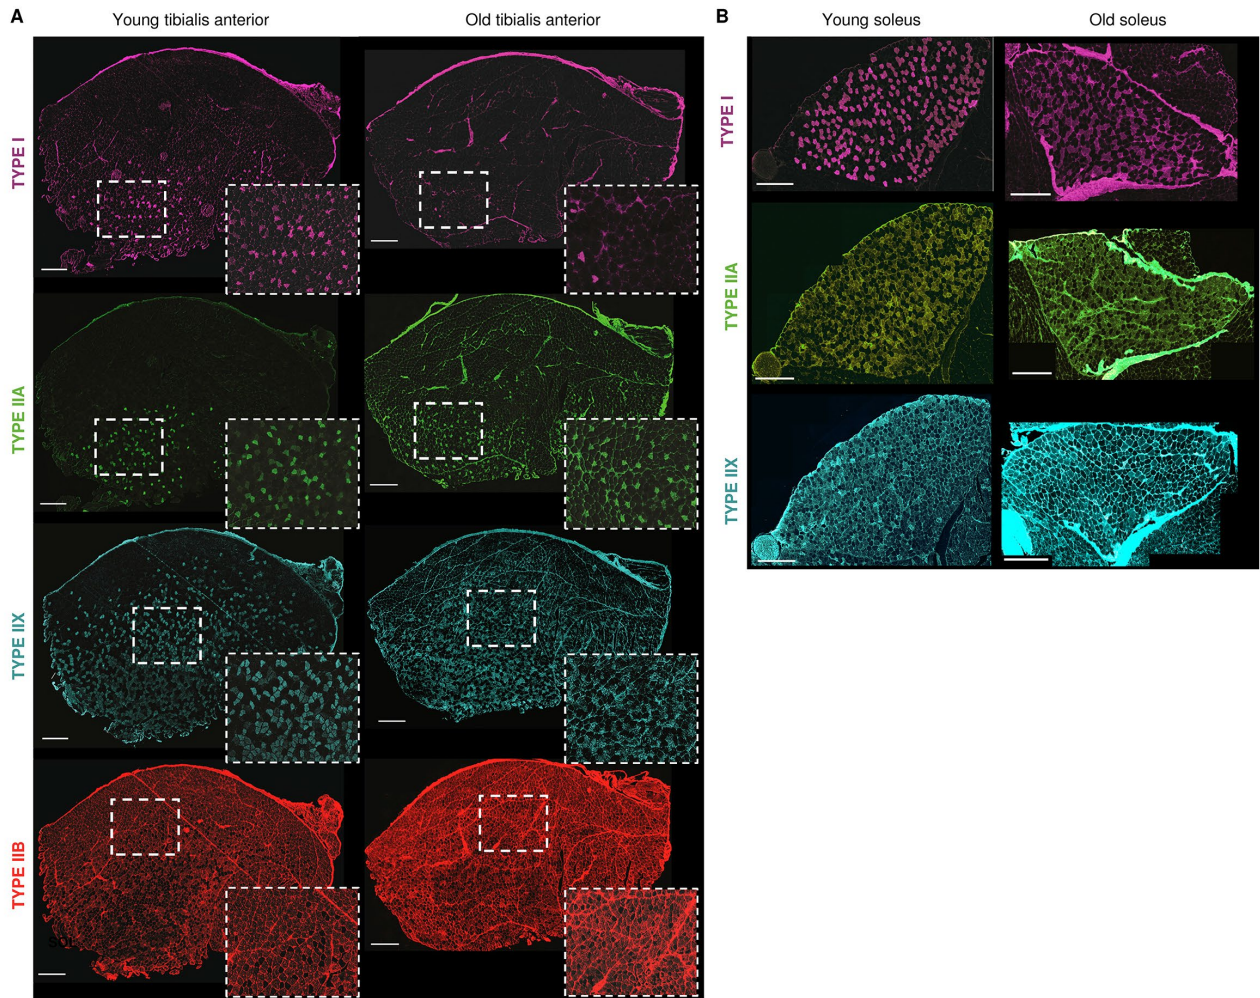

**Figure S8. Myosin heavy chain expression by young and old tibialis anterior and soleus muscles.** Cryosections of young and old tibialis anterior (A) and soleus (B) muscles were stained with anti-mouse type I, IIA, IIX and IIB myosin heavy chain (MyHC) antibodies to identify muscle fiber types. Representative images are shown. Scalebar: 400  $\mu$ m.
